# Supplementary material for: Genome-wide identification and molecular characterization of the MAPK family members in sand pear (Pyrus pyrifolia)
Source: Research Square preprint supplement (doi:10.21203/rs.3.rs-6141919/v1), 2025-03-07
Supplement: Supplementary file 1 [file 1239e6813e76a32e1461ed38.docx]

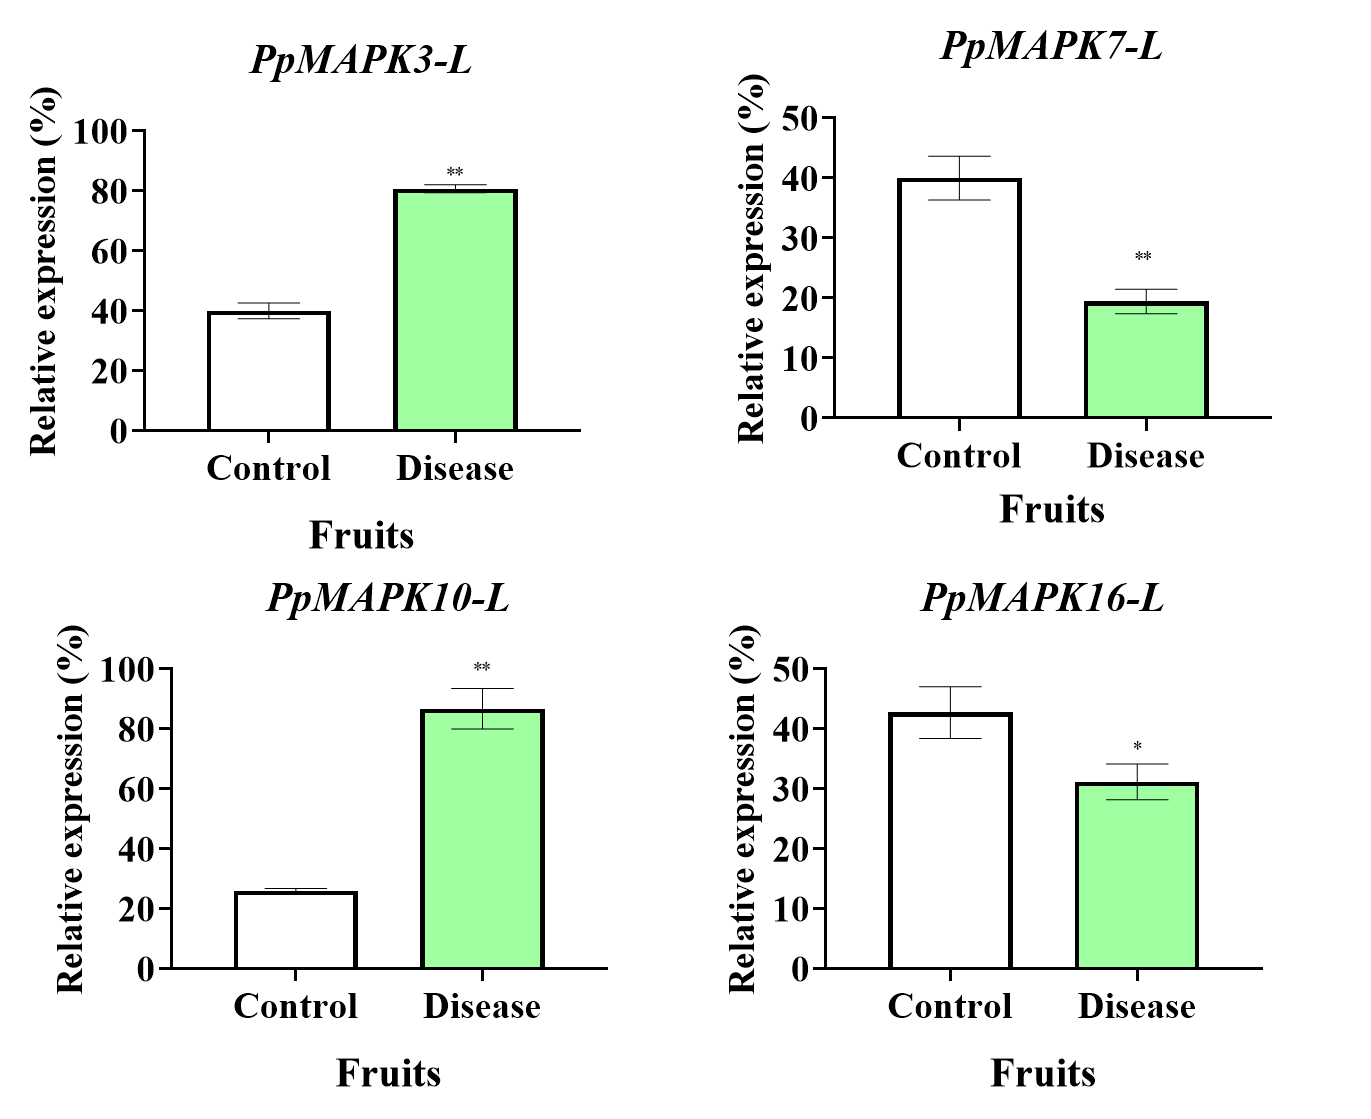


**Supplementary Figure 3.** Expression of *PpMAPK3-L*, *PpMAPK7-L*, *PpMAPK10-L* and *PpMAPK16-L* in diseased and normal fruits.
