# Supplementary material for: Genome-wide identification and molecular characterization of the MAPK family members in sand pear (Pyrus pyrifolia)
Source: Research Square preprint supplement (doi:10.21203/rs.3.rs-6141919/v1), 2025-03-07
Supplement: Supplementary file 3 [file b28f7a04c66eababcc735a78.docx]

**Supplementary Table 1.** The primer sequences for used in this study.

| **Primer Name** | **Forward primer (5’-3’)** | **Primer Name** | **Reverse primer (5’-3’)** |
| --- | --- | --- | --- |
| ***PpMAPK3-L* P1** | **CCAATGGCCATTGATCTTGTTGAC** | ***PpMAPK3-L* P2** | **GCATACTCTGGATTGAGTGCAATA** |
| ***PpMAPK7-L* P1** | **CATTGCCCTATTCCAGAGGGACAC** | ***PpMAPK7-L* P2** | **ATGGGAACCTGGGCTAGAGGATTG** |
| ***PpMAPK10-L* P1** | **TTATTGTTACCACAAGCCCAGCGC** | ***PpMAPK10-L* P2** | **CATGTTCCACTTTAGGGACTCCCA** |
| ***PpMAPK16-L* P1** | **ACAGACAGACAGGAGCAGTGGGAT** | ***PpMAPK16-L* P2** | **GCAGCAGGATATTGAGTTGGAGCA** |
| ***PpBZIP2* P1** | **CTGATTGACCCTAAGAGAGCC** | ***PpBZIP2* P2** | **GAGCTCCTTATTCTCAGCAGT** |
| ***PpUBI* P1** | **TGCAGATCTTCGTGAAAACCCTAAC** | ***PpUBI* P2** | **CATAGCACTTGCGGCAGATCATCT** |
| **PpMAPK3-L-BD-F** | **ATGGCCATGGAGGCC GAATTC ATGGCCGACCTCACTCCAC** | **PpMAPK3-L-BD-R** | **TCGACGGATCCCCGG GAATTC TTAAGCATACTCTGGATTGAGTGC** |
| **PpMAPK7-L-BD-F** | **ATGGCCATGGAGGCC GAATTC ATGGCAACTTTAGTTGAGCCTC** | **PpMAPK7-L-BD-R** | **TCGACGGATCCCCGG GAATTC CTAGGCATGCACAAAAGCCG** |
| **PpMAPK10-L-BD-F** | **ATGGCCATGGAGGCC GAATTC TACAAAATTCAGGAAGTTATCGGG** | **PpMAPK10-L-BD-R** | **TCGACGGATCCCCGG GAATTC CTTAAAATAAGGATCAGCGAGTGC** |
| **PpMAPK16-L-BD-F** | **ATGGCCATGGAGGCC GAATTC GAGGGTAGTAGGTATAAAATAGAGG** | **PpMAPK16-L-BD-R** | **TCGACGGATCCCCGG GAATTC CTTAAAATAGGGATCAGCAAGGG** |
| **PpBZIP2-AD-F** | **GCCATGGAGGCCAGT GAATTC CTGATTGACCCTAAGAGAGCC** | **PpBZIP2-AD-R** | **ATGCCCACCCGGGTG GAATTC GAGCTCCTTATTCTCAGCAGT** |
| **PpBZIP3-AD-F** | **GCCATGGAGGCCAGT GAATTC ATGCAAGAGCAGGCGACG** | **PpBZIP3-AD-R** | **ATGCCCACCCGGGTG GAATTC TCAATCCGCATTTGCACTACC** |
