# Supplementary material for: Genome-wide identification and molecular characterization of the MAPK family members in sand pear (Pyrus pyrifolia)
Source: Research Square preprint supplement (doi:10.21203/rs.3.rs-6141919/v1), 2025-03-07
Supplement: Supplementary file 4 [file e73004869a24bf75579a383c.docx]

| **Species** | **Numbers** |
| --- | --- |
| *Pyrus pyrifolia* | 25 |
| *Oryza sativa* | 15 |
| *Zea mays* | 19 |
| *Cicer arietinum* | 19 |
| *Actinidia chinensis* | 18 |
| *Hordeum vulgare* | 20 |
| *Gossypium raimondii* | 28 |
| *Triticum aestivum* | 54 |
| *Fagopyrum tataricum* | 16 |
| *Brachypodium distachyon* | 16 |
| *Nicotiana tabacum* | 17 |
| *Solanum Lycopersicum* | 16 |
| *Populus alba* | 21 |
| *Malus domestica* | 26 |
| *Glycine max* | 38 |

**Supplementary Table 2.** Summary of the number and groups of MAPK superfamily in different species.
