# Supplementary figures and images for: Genome-wide identification and molecular characterization of the MAPK family members in sand pear (Pyrus pyrifolia)
Source: Research Square preprint supplement (doi:10.21203/rs.3.rs-6141919/v1), 2025-03-07

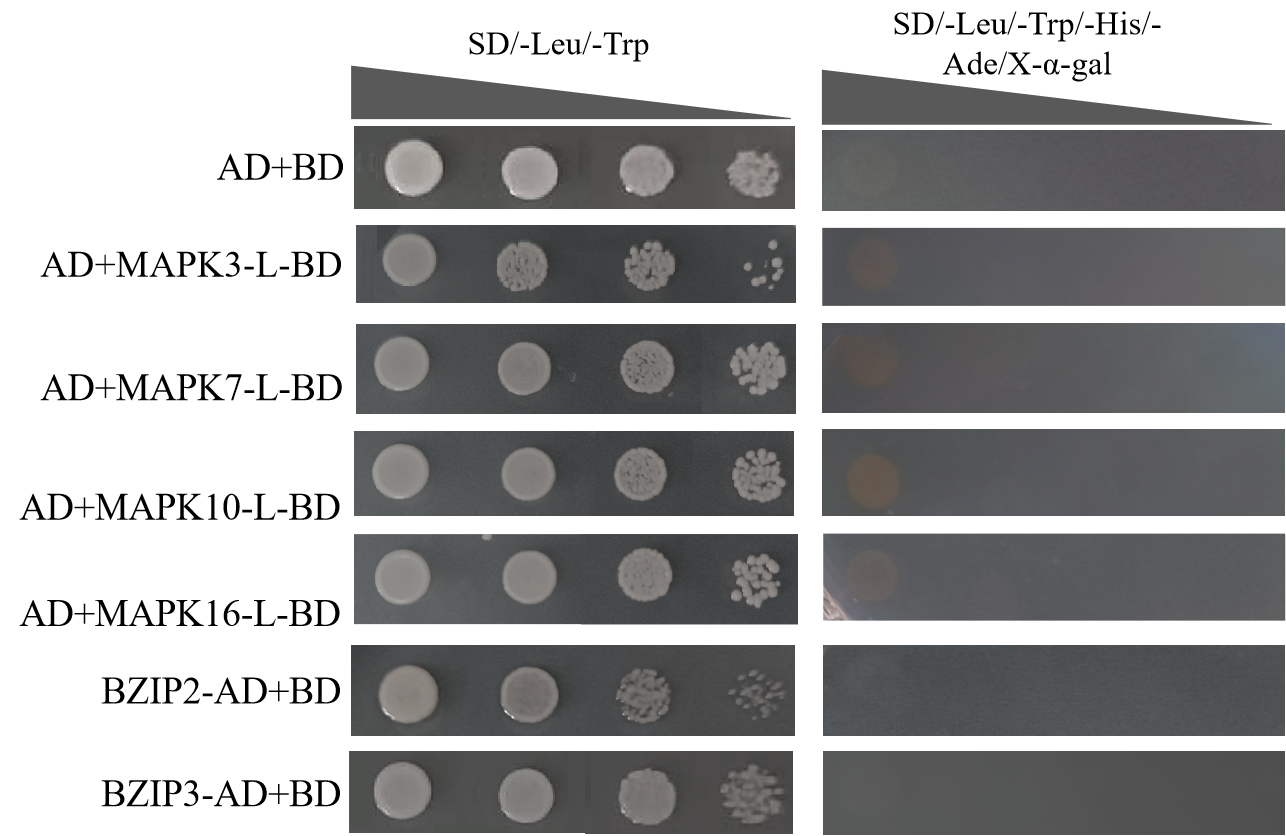


**Supplementary Figure 2.** The self-activation detection PpMAPK and PpBZIP.

Supplement: Supplementary file 2 [file 5113c491a08f4188222e37d6.docx]

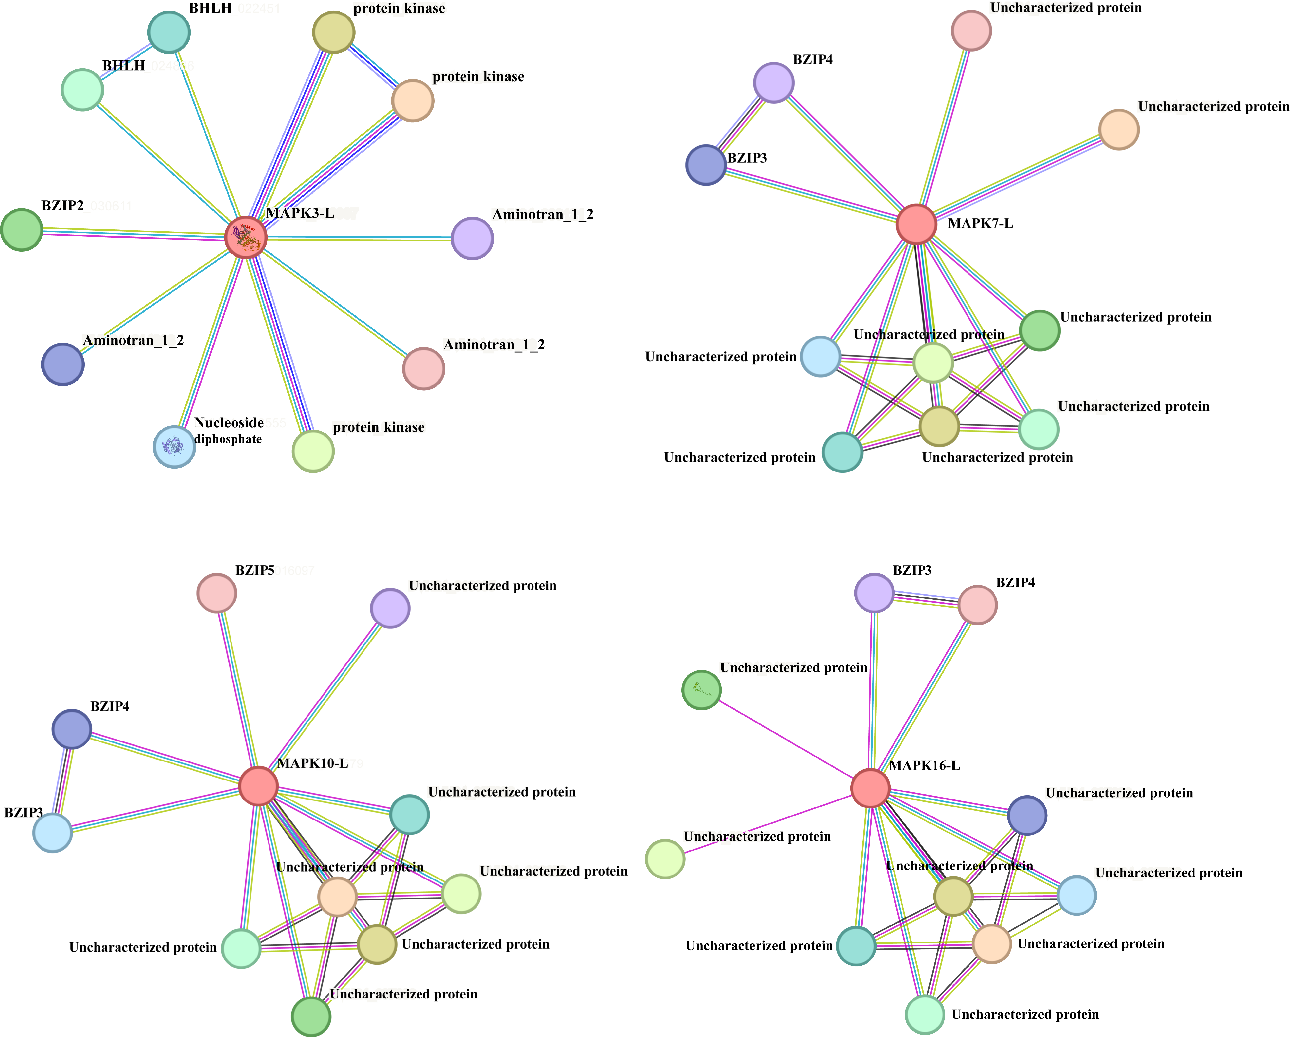


**Supplementary Figure 1.** The interaction model diagrams of PpMAPKs.

Supplement: Supplementary file 5 [file e82bb1de647990ab7d52b7df.docx]
